# Supplementary material for: Wenfei Buqi Tongluo Formula Against Bleomycin-Induced Pulmonary Fibrosis by Inhibiting TGF-β/Smad3 Pathway
Source: PubMed Central journal article supplement (PMC8814462; doi:10.3389/fphar.2021.762998), 2022-01-21
Supplement: Presentation1.pdf [file Presentation1.pdf]

## **Wenfei Buqi Tongluo formula prevents bleomycin-induced pulmonary fibrosis by inhibiting TGF- $\beta$ 1/Smad3 pathway**

Lu Ding<sup>1\*</sup>, Yaxin Li<sup>2\*</sup>, Yingying Yang<sup>3</sup>, Siyu Song<sup>2</sup>, Hongyu Qi<sup>1</sup>, Jing Wang<sup>4</sup>, Ziyuan Wang<sup>5</sup>, Jiachao Zhao<sup>2</sup>, Wei Zhang<sup>6</sup>, Linhua Zhao<sup>7</sup>, Daqing Zhao<sup>1</sup>, Xiangyan Li<sup>1#</sup>, Zeyu Wang<sup>6#</sup>

<sup>1</sup>Jilin Ginseng Academy, Key Laboratory of Active Substances and Biological Mechanisms of Ginseng Efficacy, Ministry of Education, Jilin Provincial Key Laboratory of Bio-Macromolecules of Chinese Medicine, Changchun University of Chinese Medicine, Changchun, China. <sup>2</sup>College of Integrated Traditional Chinese and Western Medicine, Changchun University of Chinese Medicine, Changchun, China. <sup>3</sup>Graduate College, Beijing University of Chinese Medicine, Beijing, China. <sup>4</sup>Department of Respiratory, Affiliated Hospital of Changchun University of Chinese Medicine, Changchun, China. <sup>5</sup>College of Traditional Chinese Medicine, Changchun University of Chinese Medicine, Changchun, China. <sup>6</sup>Department of Scientific Research, Changchun University of Chinese Medicine, Changchun, China. <sup>7</sup>Molecular Biology Laboratory, Guang'anmen Hospital, China Academy of Chinese Medical Sciences, Beijing, China.

\*These authors contributed equally for this article.

#Corresponding author: Xiangyan Li, Jilin Ginseng Academy, Key Laboratory of Active Substances and Biological Mechanisms of Ginseng Efficacy, Ministry of Education, Jilin Provincial Key Laboratory of Bio-Macromolecules of Chinese Medicine, Changchun University of Chinese Medicine, No. 1035 Boshuo Road, Changchun, 130017 China. Email: [xiangyan\\_li1981@163.com](mailto:xiangyan_li1981@163.com). Zeyu Wang, Department of Scientific Research, Changchun University of Chinese Medicine, Changchun, No. 1035 Boshuo Road, Changchun, 130017 China. Email: [zeyu781022@163.com](mailto:zeyu781022@163.com).

**Table S1.** Primer sequences for quantitative real-time PCR analysis

| <b>Gene name</b>      | <b>Primer sequences</b> |
|-----------------------|-------------------------|
| Mouse N-Cadherin-F    | AGCGCAGTCTTACCGAAGG     |
| Mouse N-Cadherin-R    | TCGCTGCTTTCATACTGAACTTT |
| Mouse E-Cadherin-F    | CAGGTCTCCTCATGGCTTTGC   |
| Mouse E-Cadherin-R    | CTTCCGAAAAGAAGGCTGTCC   |
| Mouse $\alpha$ -SMA-F | GTCCCAGACATCAGGGAGTAA   |
| Mouse $\alpha$ -SMA-R | TCGGATACTTCAGCGTCAGGA   |
| Mouse Collagen I-F    | GGCAAGAATGGAGATGATGG    |
| Mouse Collagen I-R    | ACCATCCAAACCACTGAAGC    |
| Mouse GAPDH-F         | AGGTCGGTGTGAACGGATTTG   |
| Mouse GAPDH-R         | TGTAGACCATGTAGTTGAGGTCA |

**Table S2.** Retention time (RT), accurate mass, fragment ions, predicted chemical formula, mass error (PPM), source and identification of components in WBT detected by UHPLC/Q-TOF-MS.

| NO. | RT (min) | Observed m / z | Adducts | accurate mass | Formula                                          | Mass error (ppm) | MS/MS                                                                          | Identified compounds             | source               |
|-----|----------|----------------|---------|---------------|--------------------------------------------------|------------------|--------------------------------------------------------------------------------|----------------------------------|----------------------|
| 1   | 7.10     | 474.1622       | M-H     | 475.1690      | C <sub>20</sub> H <sub>29</sub> NO <sub>12</sub> | 2.11             | 474.1607, 382.0999, 333.9960, 266.0899, 206.0681, 165.0196, 134.0476, 116.9289 | Mandelic Amide-β-gentiobioside   | Tao-ren              |
| 2   | 7.52     | 353.0875       | M-H     | 354.0951      | C <sub>16</sub> H <sub>18</sub> O <sub>9</sub>   | 0.57             | 353.0877, 254.0444, 191.0564, 135.0456                                         | Cryptochlorogenic acid or isomer | Zi-wan/Kuan-dong-hua |
| 3   | 8.74     | 353.0875       | M-H     | 354.0951      | C <sub>16</sub> H <sub>18</sub> O <sub>9</sub>   | 0.57             | 353.0879, 289.0722, 191.0564, 171.0303, 133.0298                               | Chlorogenic acid                 | Zi-wan/Kuan-dong-hua |
| 4   | 9.25     | 456.1500       | M-H     | 457.1584      | C <sub>20</sub> H <sub>27</sub> NO <sub>11</sub> | -1.36            | 456.1513, 323.0984, 221.0667                                                   | Amygdalin                        | Tao-ren              |
| 5   | 9.25     | 179.0343       | M-H     | 180.0423      | C <sub>9</sub> H <sub>8</sub> O <sub>4</sub>     | -1.12            | 179.0354, 135.0454                                                             | Caffeic acid                     | Zi-wan               |
| 6   | 9.34     | 456.1500       | M-H     | 457.1584      | C <sub>20</sub> H <sub>27</sub> NO <sub>12</sub> | -1.36            | 456.1513, 323.0984, 221.0667                                                   | Mandelic acid-β-gentiobioside    | Tao-ren              |
| 7   | 11.72    | 301.0354       | M-H     | 302.0427      | C <sub>15</sub> H <sub>10</sub> O <sub>7</sub>   | 1.59             | 271.0249, 255.0300, 243.0299, 211.0423                                         | Viscidulin I                     | Huang-qin            |

|     |       |          |      |           |                                                 |       |                                                                                                    |                                                                             |                    |
|-----|-------|----------|------|-----------|-------------------------------------------------|-------|----------------------------------------------------------------------------------------------------|-----------------------------------------------------------------------------|--------------------|
| 8*  | 11.74 | 491.1186 | M+FA | 446.1213  | C <sub>22</sub> H <sub>22</sub> O <sub>10</sub> | -0.83 | 283.0614, 268.0377, 239.0352, 211.0423                                                             | Calycosin-7-glucoside                                                       | Huang-qi           |
| 9   | 11.80 | 389.1240 | M-H  | 390.1315  | C <sub>20</sub> H <sub>22</sub> O <sub>8</sub>  | 0.69  | 389.1245, 376.0099, 227.0715, 185.0610, 143.0506                                                   | Polydatin                                                                   | Hu-zhang           |
| 10  | 11.95 | 547.1456 | M-H  | 548.1530  | C <sub>26</sub> H <sub>28</sub> O <sub>13</sub> | 0.71  | 547.1463, 457.1144, 367.0826, 337.0721, 281.0820                                                   | Chrysin 6-C- $\alpha$ -L-arabinoside<br>8-C- $\beta$ -D-glucoside or isomer | Huang-qin          |
| 11  | 12.20 | 463.0881 | M-H  | 464.0955  | C <sub>21</sub> H <sub>20</sub> O <sub>12</sub> | 0.78  | 463.0853, 367.0828, 337.0003, 281.0819, 271.0252                                                   | Aicalein B or isomer                                                        | Huang-qin          |
| 12* | 12.32 | 461.0726 | M-H  | 462.0798  | C <sub>21</sub> H <sub>18</sub> O <sub>12</sub> | 1.34  | 461.0730, 445.0780, 285.0408, 175.0252                                                             | Scutellarin                                                                 | Huang-qin          |
| 13  | 12.94 | 547.1454 | M-H  | 548.1530  | C <sub>26</sub> H <sub>28</sub> O <sub>13</sub> | 0.29  | 547.1455, 529.1348, 457.1138, 427.1032, 367.0823, 337.0717, 309.0766, 281.0816, 267.0661, 251.0712 | Chrysin 6-C- $\beta$ -L-arabinoside<br>8-C- $\beta$ -D-glucoside or isomer  | Huang-qin          |
| 14  | 13.47 | 547.1453 | M-H  | 548.1530  | C <sub>26</sub> H <sub>28</sub> O <sub>13</sub> | 0.22  | 547.1460, 457.1142, 427.1032, 367.0825, 337.0718, 309.0768, 281.0816, 267.0661, 251.0713           | Chrysin 6-C- $\beta$ -D-arabinoside<br>8-C- $\beta$ -D-glucoside or isomer  | Huang-qin          |
| 15  | 13.73 | 515.1205 | M-H  | 516.12680 | C <sub>25</sub> H <sub>24</sub> O <sub>12</sub> | 2.91  | 515.1198, 407.0076, 353.0880, 191.0564, 173.0459, 161.0248, 135.0455                               | Isochlorogenic acid A or<br>isomer                                          | Kuan- dong-<br>hua |

|     |       |          |      |           |                                                 |       |                                                                                      |                                               |                    |
|-----|-------|----------|------|-----------|-------------------------------------------------|-------|--------------------------------------------------------------------------------------|-----------------------------------------------|--------------------|
| 16  | 14.18 | 515.1176 | M-H  | 516.12680 | C <sub>25</sub> H <sub>24</sub> O <sub>12</sub> | -2.72 | 515.1194, 353.0876, 324.0082,<br>191.0562, 179.0351, 161.0245,<br>135.0454           | Isochlorogenic acid B or<br>isomer            | Kuan- dong-<br>hua |
| 17  | 15.07 | 541.1355 | M-H  | 542.14240 | C <sub>27</sub> H <sub>26</sub> O <sub>12</sub> | 1.66  | 541.1353, 313.0571, 227.07190,<br>185.0608, 124.0169                                 | Gallic acid polydatin                         | Hu-zhang           |
| 18  | 16.00 | 283.0610 | M-H  | 284.06850 | C <sub>16</sub> H <sub>12</sub> O <sub>5</sub>  | 1.06  | 283.0611, 268.0376, 239.0348,<br>211.0399, 195.0452                                  | 5,4'-Dihydroxy-7-<br>methoxyflavone or isomer | Huang-qin          |
| 19  | 16.75 | 515.1175 | M-H  | 516.12680 | C <sub>25</sub> H <sub>24</sub> O <sub>12</sub> | -2.91 | 515.1193, 353.0876, 324.0084,<br>191.0563, 173.0458, 135.0454                        | Isochlorogenic acid C or<br>isomer            | Kuan- dong-<br>hua |
| 20* | 17.61 | 475.0872 | M-H  | 476.0955  | C <sub>22</sub> H <sub>20</sub> O <sub>12</sub> | -1.14 | 475.0883, 412.9950, 381.9777,<br>339.9676, 284.0327, 255.0300,<br>227.0357, 183.0450 | Scutellarin methylester                       | Huang-qin          |
| 21  | 18.61 | 345.0607 | M-H  | 346.0689  | C <sub>17</sub> H <sub>14</sub> O <sub>8</sub>  | -1.04 | 345.0607, 324.9797, 269.0458                                                         | Viscidulin III                                | Huang-qin          |
| 22  | 18.33 | 431.0971 | M-H  | 432.1056  | C <sub>21</sub> H <sub>20</sub> O <sub>10</sub> | -1.72 | 431.1023, 269.0463, 240.0436,<br>225.0552, 241.0501                                  | Emodin-8-β-D-glucoside                        | Hu-zhang           |
| 23* | 21.45 | 891.1620 | 2M-H | 446.0849  | C <sub>21</sub> H <sub>18</sub> O <sub>11</sub> | -0.03 | 445.0776, 383.0764, 341.0668,<br>269.0455, 251.0350, 241.0504,<br>222.0401           | Baicalin                                      | Huang-qin          |
| 24* | 22.28 | 717.1454 | M-H  | 718.1534  | C <sub>36</sub> H <sub>30</sub> O <sub>16</sub> | -0.33 | 717.1452, 519.0933, 339.0510,<br>321.0405, 293.0455, 279.0300,                       | Salvianolic acid B                            | Dan-shen           |

|     |       |          |     |          |                                                 |       |                                                                                                             |                                                             |           |
|-----|-------|----------|-----|----------|-------------------------------------------------|-------|-------------------------------------------------------------------------------------------------------------|-------------------------------------------------------------|-----------|
|     |       |          |     |          |                                                 |       | 265.0505, 249.0556, 221.0607,<br>185.0246                                                                   |                                                             |           |
| 25  | 23.32 | 447.0945 | M-H | 448.1006 | C <sub>21</sub> H <sub>20</sub> O <sub>11</sub> | 3.87  | 447.0928, 383.9940, 271.0613,<br>243.0663, 225.0559                                                         | Dihydrobaicalin                                             | Huang-qin |
| 26  | 24.25 | 445.0769 | M-H | 446.0849 | C <sub>21</sub> H <sub>18</sub> O <sub>11</sub> | -0.52 | 445.0776, 381.9781, 340.9755,<br>324.979, 269.0456, 241.0505,<br>225.0556, 197.0611                         | Norwogonin-7-O-β-D-<br>glucuronide or isomer                | Huang-qin |
| 27* | 24.98 | 493.1126 | M-H | 494.1213 | C <sub>26</sub> H <sub>22</sub> O <sub>10</sub> | -1.76 | 295.0594, 249.0543, 221.0587,<br>197.0632, 185.0245                                                         | Salvianolic acid A                                          | Dan-shen  |
| 28  | 25.72 | 429.0834 | M-H | 430.0900 | C <sub>21</sub> H <sub>18</sub> O <sub>10</sub> | 2.87  | 429.0831, 403.9677, 308.9851,<br>253.0507, 209.0607                                                         | Chrysin-7-O-β-D-glucuronide                                 | Huang-qin |
| 29  | 25.99 | 459.0929 | M-H | 460.1006 | C <sub>22</sub> H <sub>20</sub> O <sub>11</sub> | 0.22  | 459.0928, 403.9678, 283.0610,<br>268.0357, 239.0349, 211.0401                                               | Oroxylin-7-O-β-D-glucuronide                                | Huang-qin |
| 30  | 26.47 | 475.0889 | M-H | 476.0955 | C <sub>22</sub> H <sub>20</sub> O <sub>12</sub> | 2.44  | 475.0883, 411.9881, 355.9625,<br>339.9669, 299.0561, 284.0326,<br>255.0300, 239.0350, 171.0453,<br>153.9911 | 5,2'-Dihydroxy-6-<br>methoxyflavone-7-O-β-D-<br>glucuronide | Huang-qin |
| 31* | 27.12 | 431.0987 | M-H | 432.1056 | C <sub>21</sub> H <sub>20</sub> O <sub>10</sub> | 2.06  | 431.0985, 381.9781, 340.9755,<br>324.9798, 311.0564, 293.0456,<br>282.0552, 269.0457, 240.0429,             | Emodin glucoside                                            | Hu-zhang  |

|     |       |          |      |          |                                                 |       |                                                                            |                                                               |           |
|-----|-------|----------|------|----------|-------------------------------------------------|-------|----------------------------------------------------------------------------|---------------------------------------------------------------|-----------|
|     |       |          |      |          |                                                 |       | 255.0557, 210.0313, 197.0608,<br>182.0376                                  |                                                               |           |
| 32* | 27.75 | 459.0927 | M-H  | 460.1006 | C <sub>22</sub> H <sub>20</sub> O <sub>11</sub> | 0.87  | 459.0936, 403.9683, 283.0613,<br>268.0377, 239.0351, 211.0403,<br>163.0040 | Wogonoside                                                    | Huang-qin |
| 33  | 28.59 | 489.1039 | M-H  | 490.1111 | C <sub>23</sub> H <sub>22</sub> O <sub>12</sub> | 1.23  | 489.1039, 313.0718, 298.0484,<br>283.0250                                  | 5,7-Dihydroxy-6,8-<br>methoxyflavone glucoronide or<br>isomer | Huang-qin |
| 34* | 30.42 | 285.0402 | M-H  | 286.0477 | C <sub>15</sub> H <sub>10</sub> O <sub>6</sub>  | 0.98  | 269.0455, 240.0427, 225.0556,<br>211.0394, 195.0452, 183.0440              | Scutellarein                                                  | Huang-qin |
| 35* | 31.63 | 269.0455 | M-H  | 270.0528 | C <sub>15</sub> H <sub>10</sub> O <sub>5</sub>  | 2.01  | 267.0301, 239.0351, 223.0401,<br>195.0453                                  | Baicalein                                                     | Huang-qin |
| 36  | 35.50 | 283.0600 | M-H  | 284.0685 | C <sub>16</sub> H <sub>12</sub> O <sub>5</sub>  | -2.33 | 283.0610, 193.0509, 116.9288                                               | 5-7-4-Trihydroxyisoflavone                                    | Huang-qin |
| 37* | 36.31 | 829.4567 | M+FA | 784.4609 | C <sub>41</sub> H <sub>68</sub> O <sub>14</sub> | -2.28 | 783.4512, 489.3623, 383.2957                                               | Astragaloside III                                             | Huang-qi  |
| 38* | 36.59 | 283.0599 | M-H  | 284.0685 | C <sub>16</sub> H <sub>12</sub> O <sub>5</sub>  | -2.86 | 283.0611, 268.0376, 239.0352,<br>163.0041, 139.0556                        | Wogonin                                                       | Huang-qin |
| 39* | 37.02 | 871.4695 | M+FA | 826.4715 | C <sub>43</sub> H <sub>70</sub> O <sub>15</sub> | 0.29  | 818.3521, 481.0925, 352.0584                                               | Astragaloside II                                              | Huang-qi  |
| 40* | 37.24 | 283.0598 | M-H  | 284.0685 | C <sub>16</sub> H <sub>12</sub> O <sub>5</sub>  | -3.07 | 283.0610, 268.0369, 239.0348,<br>211.0404                                  | OroxylinA                                                     | Huang-qin |

|     |       |          |      |          |                                                 |      |                                                                                                |                 |          |
|-----|-------|----------|------|----------|-------------------------------------------------|------|------------------------------------------------------------------------------------------------|-----------------|----------|
| 41* | 38.26 | 913.4809 | M+FA | 868.482  | C <sub>45</sub> H <sub>72</sub> O <sub>16</sub> | 1.27 | 913.4770, 879.3804, 837.3740,<br>819.3592, 311.2230, 269.0454,<br>170.0042, 116.9287           | Astragaloside I | Huang-qi |
| 42* | 38.91 | 269.0452 | M-H  | 270.0528 | C <sub>15</sub> H <sub>10</sub> O <sub>5</sub>  | 0.71 | 269.0455, 240.0429, 255.0557,<br>211.0400, 195.0454, 182.0374,<br>171.0451, 157.0660, 116.9290 | Emodin          | Hu-zhang |

---

\* *The identification was certified by reference standards.*



**Table S3.** The contents of six key compounds in WBT extract were measured by HPLC analysis.

| <b>Component ID</b> | <b>Compound name</b>           | <b>Compound content (mg/g)</b> | <b>WBT (12g/kg)</b> | <b>Herb source</b> |
|---------------------|--------------------------------|--------------------------------|---------------------|--------------------|
| 1                   | Calycosin-7-glucoside          | 0.4499                         | 5.3988              | Huang-qin          |
| 2                   | Baicalin                       | 17.2408                        | 206.8902            | Huang-qin          |
| 3                   | Salvianolic acid B             | 3.3389                         | 40.0668             | Dan-shen           |
| 4                   | Salvianolic acid A             | 0.9600                         | 11.5200             | Dan-shen           |
| 5                   | Emodin-8- $\beta$ -D-glucoside | 1.0735                         | 12.8820             | Hu-zhang           |
| 6                   | Wogonoside                     | 6.7344                         | 80.8128             | Hu-zhang           |

**Table S4-S8.** Detailed results of network pharmacological analysis. (Uploaded as a separate Excel file).

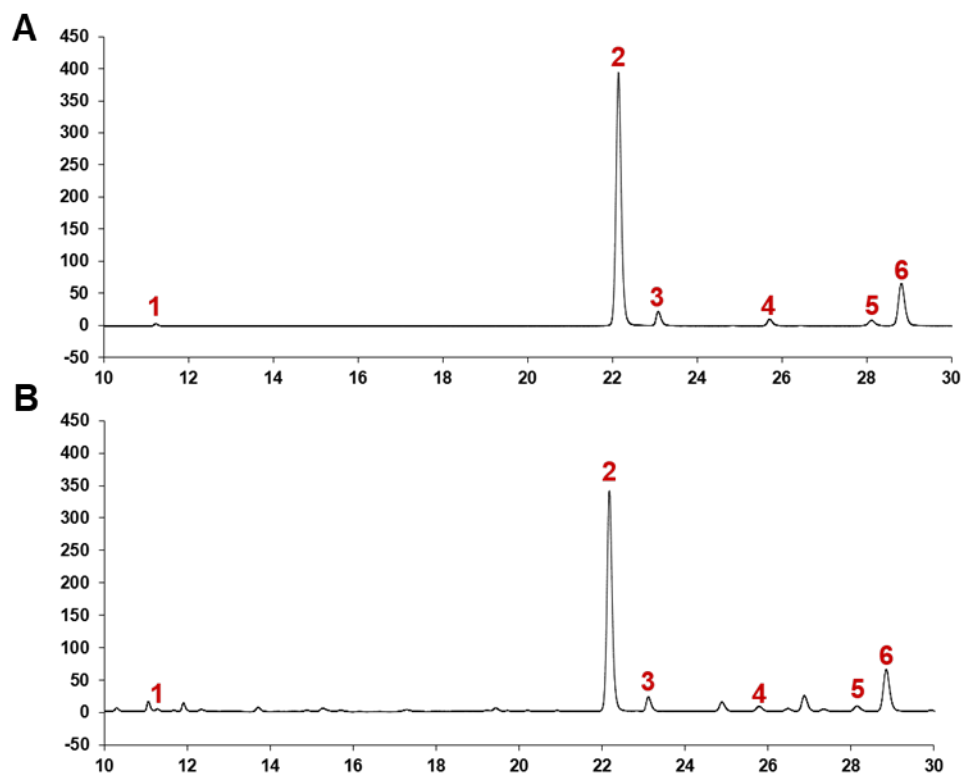

**Figure S1.** The quantitative analysis of six key compounds in WBT extract. **(A)** The chromatogram of standard mixture. **(B)** The chromatogram of the WBT extract. 1: Calycosin-7-glucoside, 2: Baicalin, 3: Salvianolic acid B, 4: Salvianolic acid A, 5: Emodin-8- $\beta$ -D-glucoside, 6: Wogonoside.

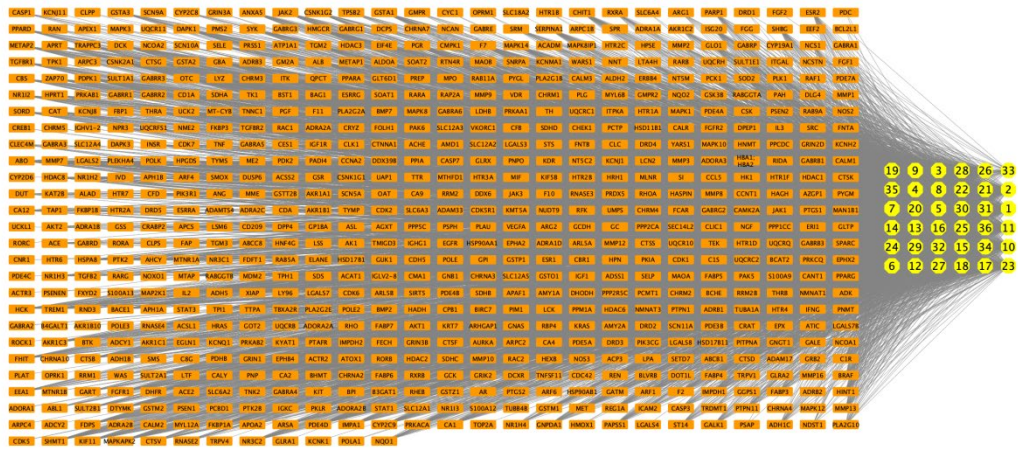

**Figure S2.** Construction of the network of 36 components–687 potential targets. The yellow octagons represent the IDs of 36 components, and the orange rectangles represent potential therapeutic targets of WBT.

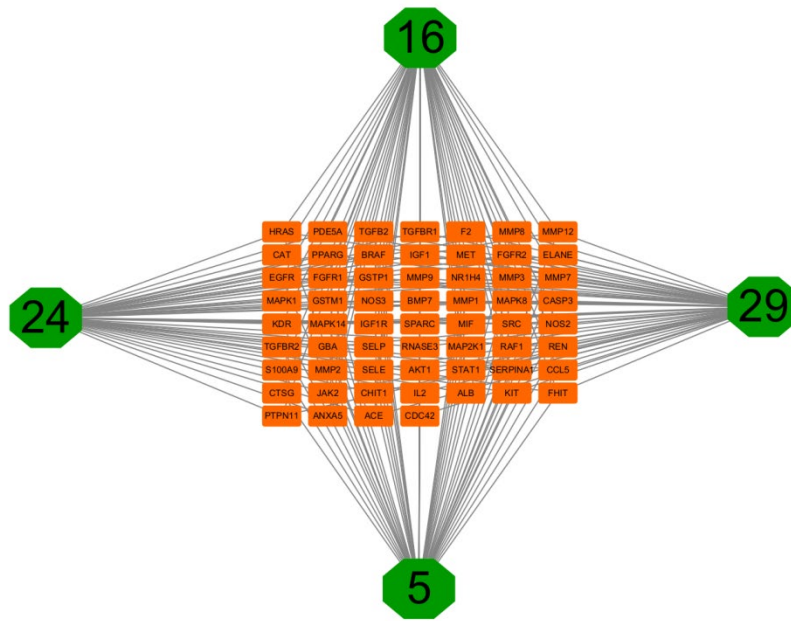

**Figure S3.** Construction of the network of top four components–overlapping targets (the degree  $\geq 48$  of components was selected as top four). The green hexagons represent IDs of components, and the orange rectangles represent potential therapeutic targets of WBT.

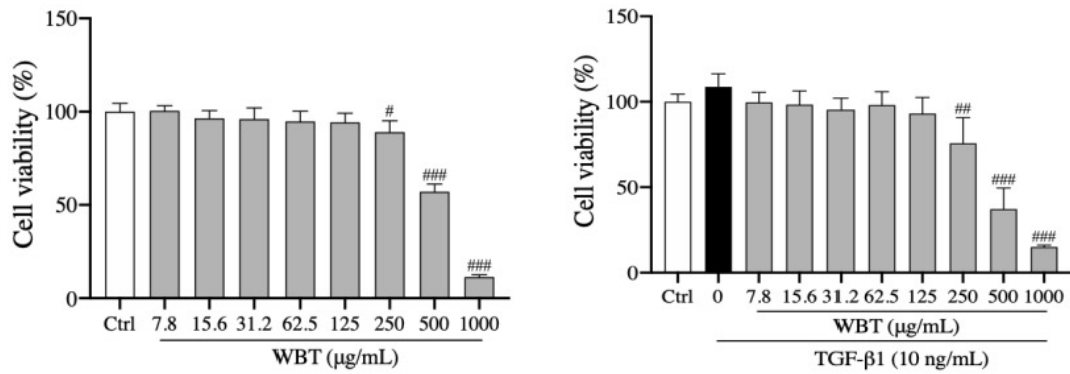

**Figure S4.** WBT inhibited the proliferation of TGF- $\beta$ 1-stimulated TC-1 cells. **(A)** After treatment with different concentrations of WBT for 48 h, the cytotoxicity of WBT in TC-1 cells was evaluated by MTT assay. **(B)** In TGF- $\beta$ 1-induced-TC-1 cells, the effect of different concentrations of WBT on cell viability after treatment for 48 h was evaluated by MTT assay. Data are shown as mean  $\pm$  standard deviation from three independent experiments. # $P$  < 0.05, ## $P$  < 0.01 and ### $P$  < 0.001 versus the Ctrl or TGF- $\beta$ 1-induced model group.
